# Supplementary material
Source: publisher figshare collection journal article supplement (https://asha.figshare.com/articles/dataset/_/16869485)
Supplement: Supplementary file 1 [file 1]

**Supplemental Material S3.** Speech recognition thresholds (dB) for S0N0 condition with and without frequency compression and the corresponding spatial release from masking [SRM (dB)] for each participant.

| Participant | No   |     | Static |     | Adaptive |     |
|-------------|------|-----|--------|-----|----------|-----|
|             | S0N0 | SRM | S0N0   | SRM | S0N0     | SRM |
| <b>1</b>    | 7    | 10  | 7      | 12  | 7        | 10  |
| <b>2</b>    | 5    | 5   | 9      | 8   | 6        | 7   |
| <b>3</b>    | 2    | 8   | 5      | 11  | 4        | 12  |
| <b>4</b>    | -2   | 7   | 1      | 9   | -1       | 7   |
| <b>5</b>    | 15   | 1   | 14     | 4   | 15       | 3   |
| <b>6</b>    | 4    | 7   | 5      | 4   | 4        | 7   |
| <b>7</b>    | 3    | 7   | 3      | 12  | 2        | 11  |
| <b>8</b>    | 2    | 8   | -1     | 6   | -1       | 8   |
