# Supplementary material
Source: publisher figshare collection journal article supplement (https://asha.figshare.com/articles/dataset/_/16869485)
Supplement: Supplementary file 2 [file 1]

**Supplemental Material S1.** Individual audibility benefit (dB) for static and adaptive frequency compression and for different sound types. LP = low-pass; HP = high-pass; BB = broadband.

| Participant | Static |    |    | Adaptive |     |     |
|-------------|--------|----|----|----------|-----|-----|
|             | LP     | BB | HP | LP       | BB  | HP  |
| <b>1</b>    | −2     | 40 | 70 | −52      | −21 | 3   |
| <b>2</b>    | −2     | 21 | 49 | −2       | 28  | 61  |
| <b>3</b>    | −17    | −6 | 3  | 8        | 17  | 28  |
| <b>4</b>    | −5     | 31 | 63 | −7       | 28  | 59  |
| <b>5</b>    | −2     | 11 | 20 | −2       | −10 | −21 |
| <b>6</b>    | 15     | 37 | 40 | 7        | 3   | −10 |
| <b>7</b>    | 2      | 46 | 66 | 7        | 40  | 48  |
| <b>8</b>    | −13    | 7  | 13 | −23      | −14 | 0   |
