# Supplementary material
Source: publisher figshare collection journal article supplement (https://asha.figshare.com/articles/dataset/_/16869485)
Supplement: Supplementary file 3 [file 1]

**Supplemental Material S2.** Individual RMSE (deg) for sound localization with (static, adaptive) and without (no) frequency compression and for different sound types. LP = low-pass; HP = high-pass; BB = broadband.

| Participant | No |    |    | Static |    |    | Adaptive |    |    |
|-------------|----|----|----|--------|----|----|----------|----|----|
|             | LP | BB | HP | LP     | BB | HP | LP       | BB | HP |
| <b>1</b>    | 77 | 57 | 63 | 80     | 62 | 81 | 76       | 71 | 38 |
| <b>2</b>    | 60 | 66 | 76 | 63     | 65 | 59 | 63       | 75 | 52 |
| <b>3</b>    | 79 | 80 | 84 | 81     | 76 | 83 | 78       | 85 | 76 |
| <b>4</b>    | 75 | 30 | 65 | 55     | 50 | 55 | 66       | 41 | 54 |
| <b>5</b>    | 79 | 54 | 77 | 69     | 50 | 47 | 72       | 39 | 61 |
| <b>6</b>    | 48 | 54 | 69 | 51     | 55 | 74 | 53       | 65 | 70 |
| <b>7</b>    | 69 | 75 | 75 | 73     | 46 | 56 | 62       | 50 | 47 |
| <b>8</b>    | 58 | 54 | 76 | 64     | 50 | 61 | 65       | 62 | 68 |
